# Supplementary material
Source: publisher site journal article supplement (https://www.dovepress.com/article/442000)
Supplement: Supplementary file 1 [file get_supplementary_file.php]

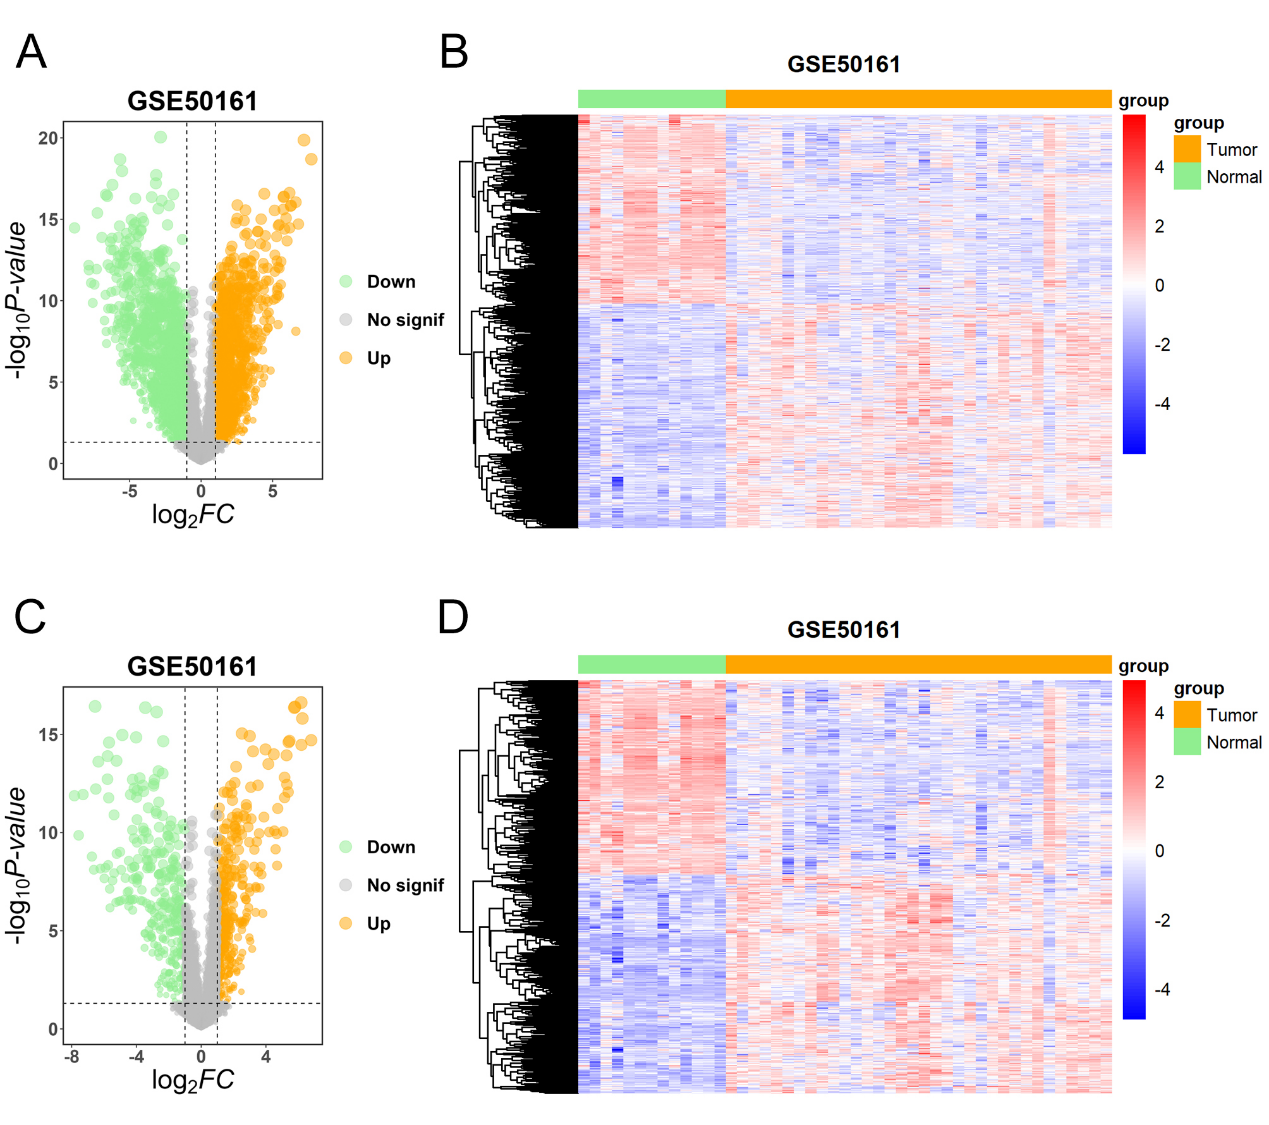
 **Figure S1** Differential gene expression and patterns in glioma. (A-B) Volcano plot and heatmap of differentially expressed genes (DEGs) in glioma relative to normal samples, showcasing a total of 3,227 DEGs with 1,477 down-regulated and 1,750 up-regulated. (C-D) Volcano plot and heatmap of liquid-liquid phase separation (LLPS)-related genes identified from DrLLPS and PhaSepDB databases. A total of 3,773 genes were recognized, with 356 upregulated and 317 downregulated.


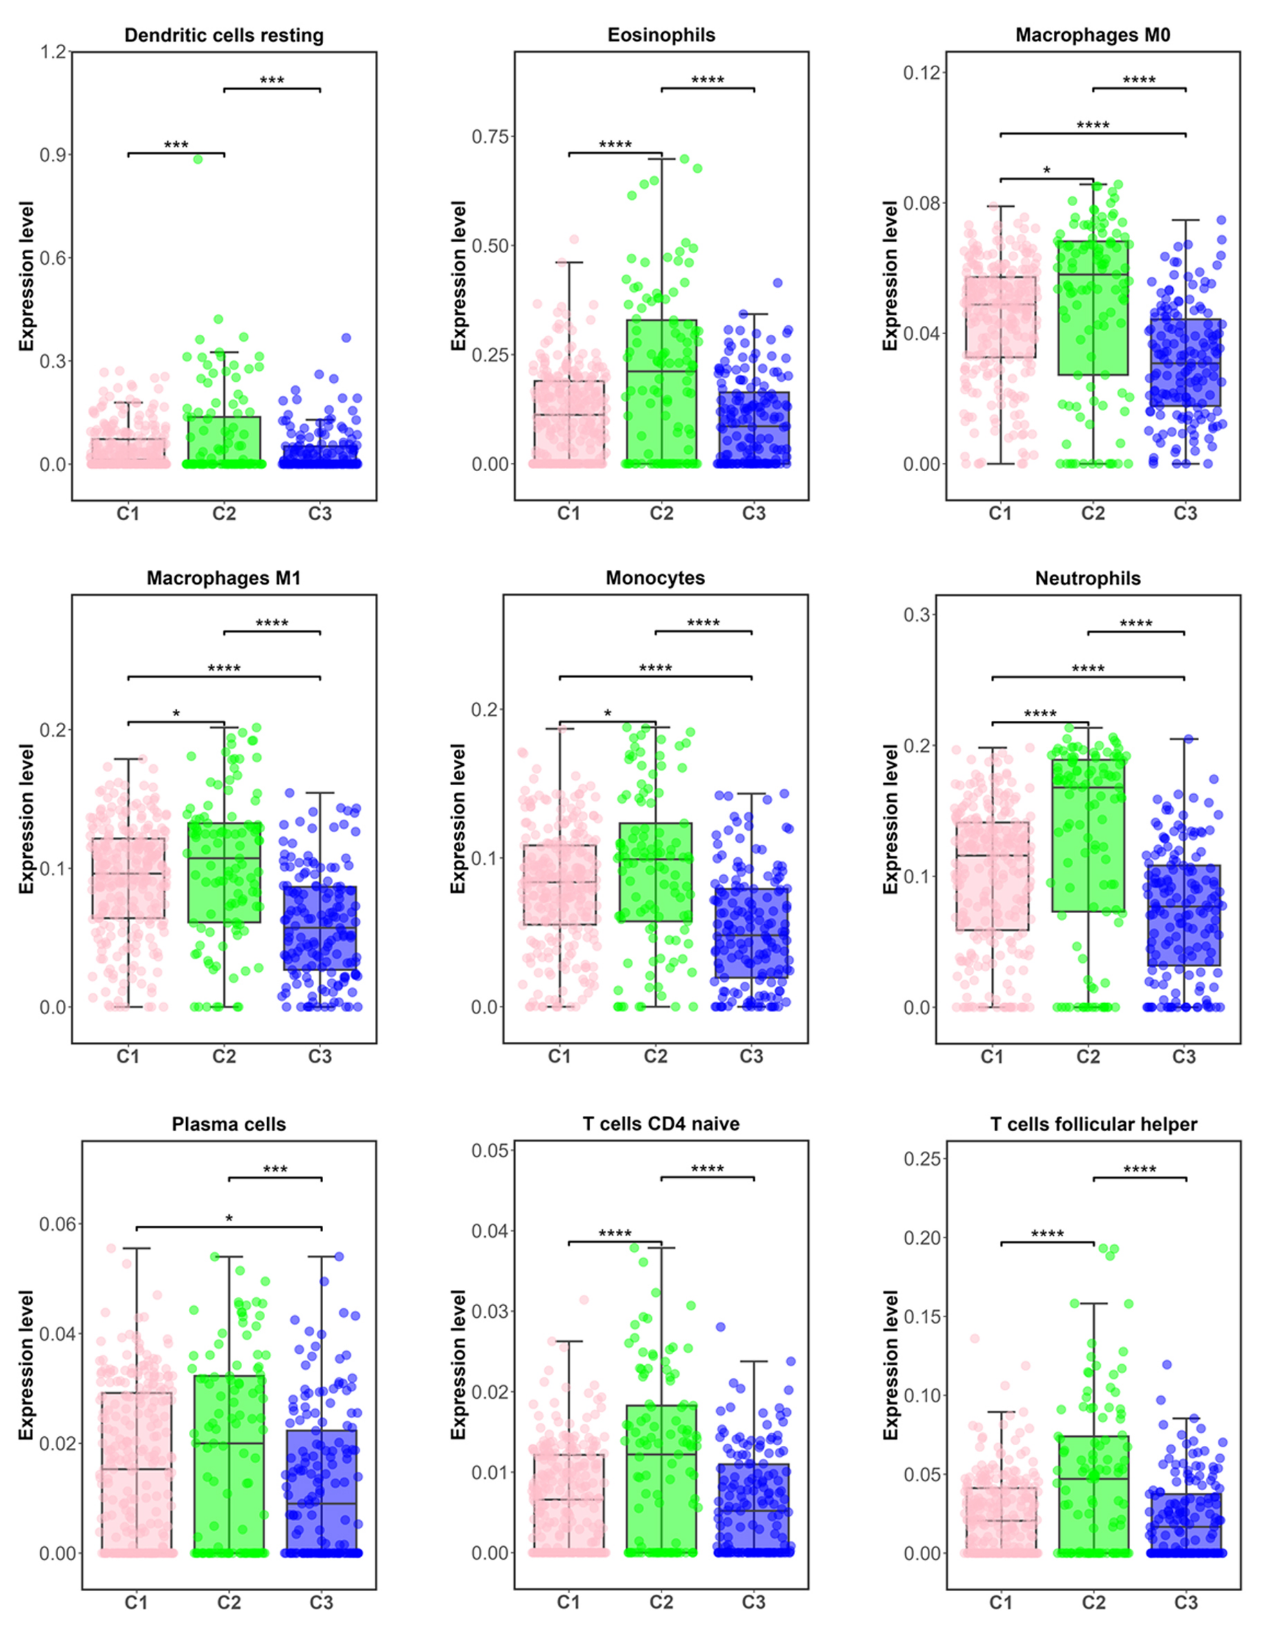
 **Figure S2** CIBERSORT analysis of the immune cell infiltration levels among three different molecular subtypes (C1, C2, and C3). Immune cells with higher infiltration levels in C2 compared to C1 and C3. *p < 0.05, ***p < 0.001, ****p < 0.0001.


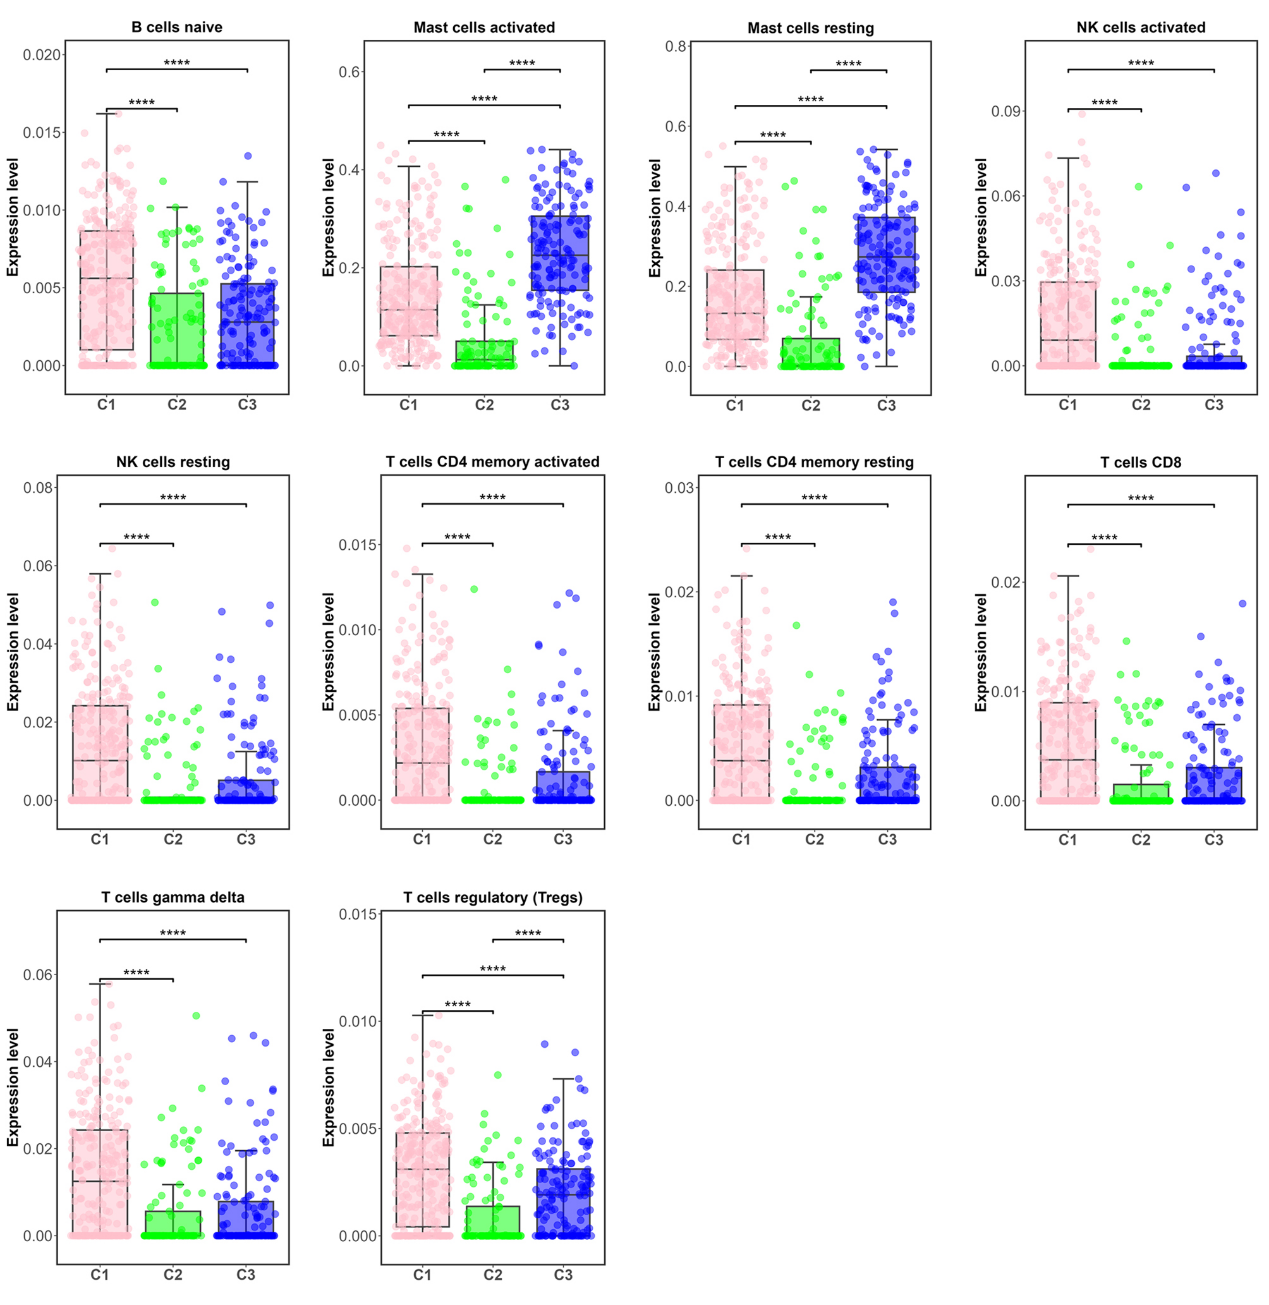


**Figure S3** CIBERSORT analysis of the immune cell infiltration levels among three different molecular subtypes (C1, C2, and C3). Immune cells with lower infiltration levels in C2 compared to C1 and C3. ****p < 0.0001.


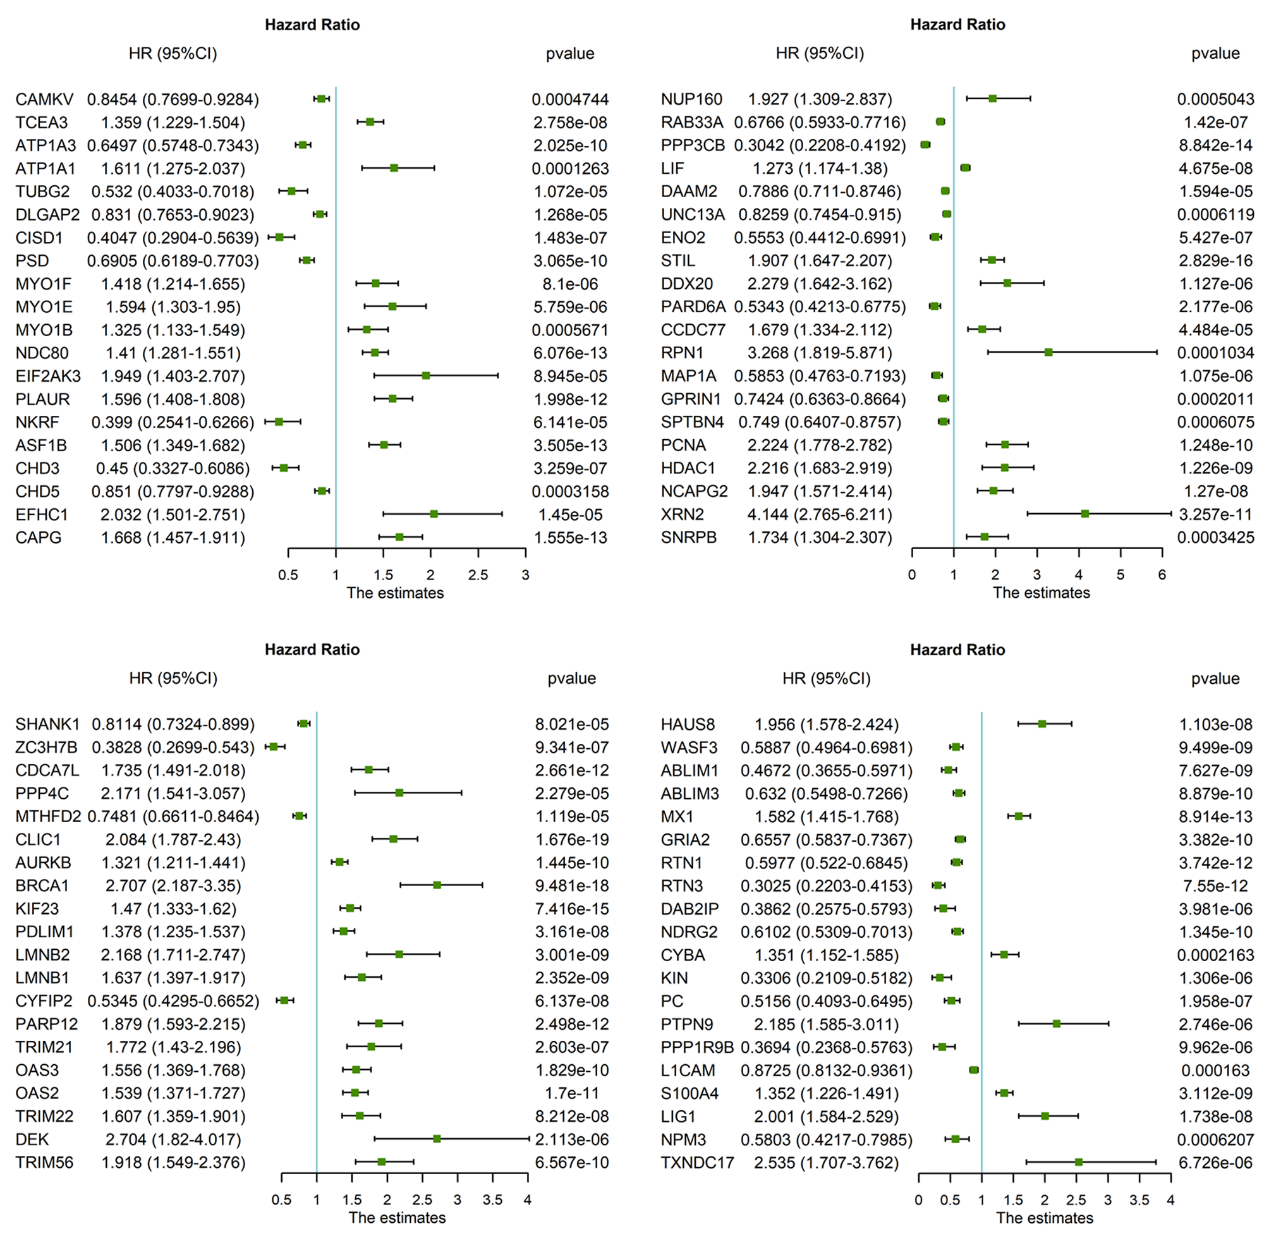

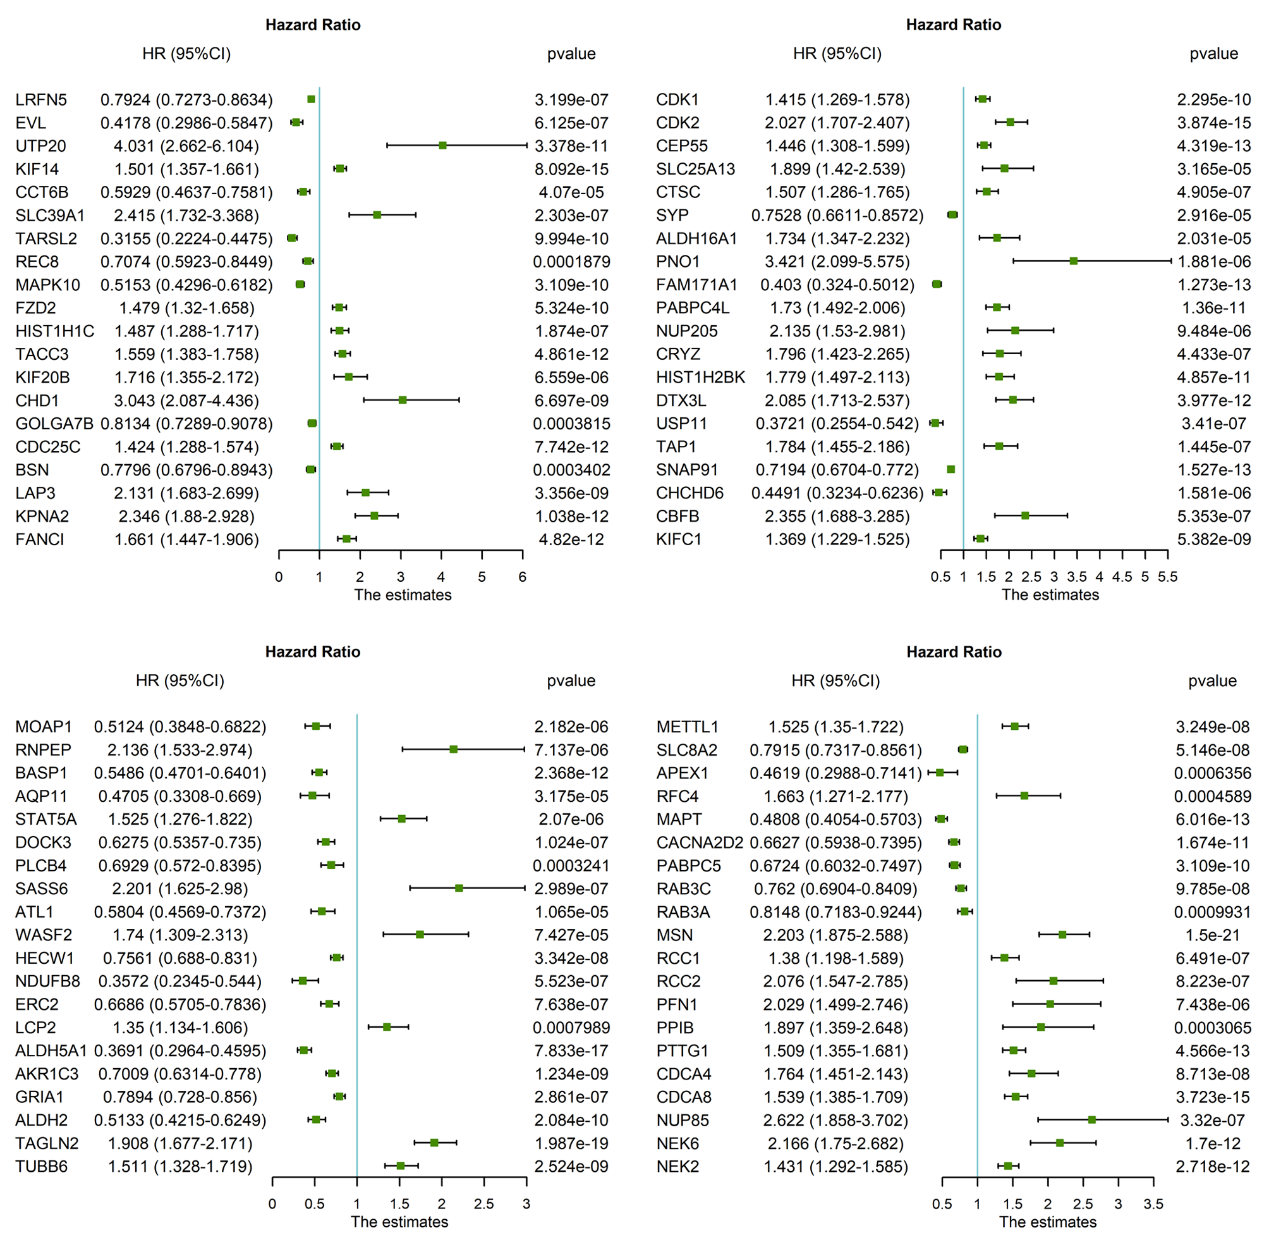

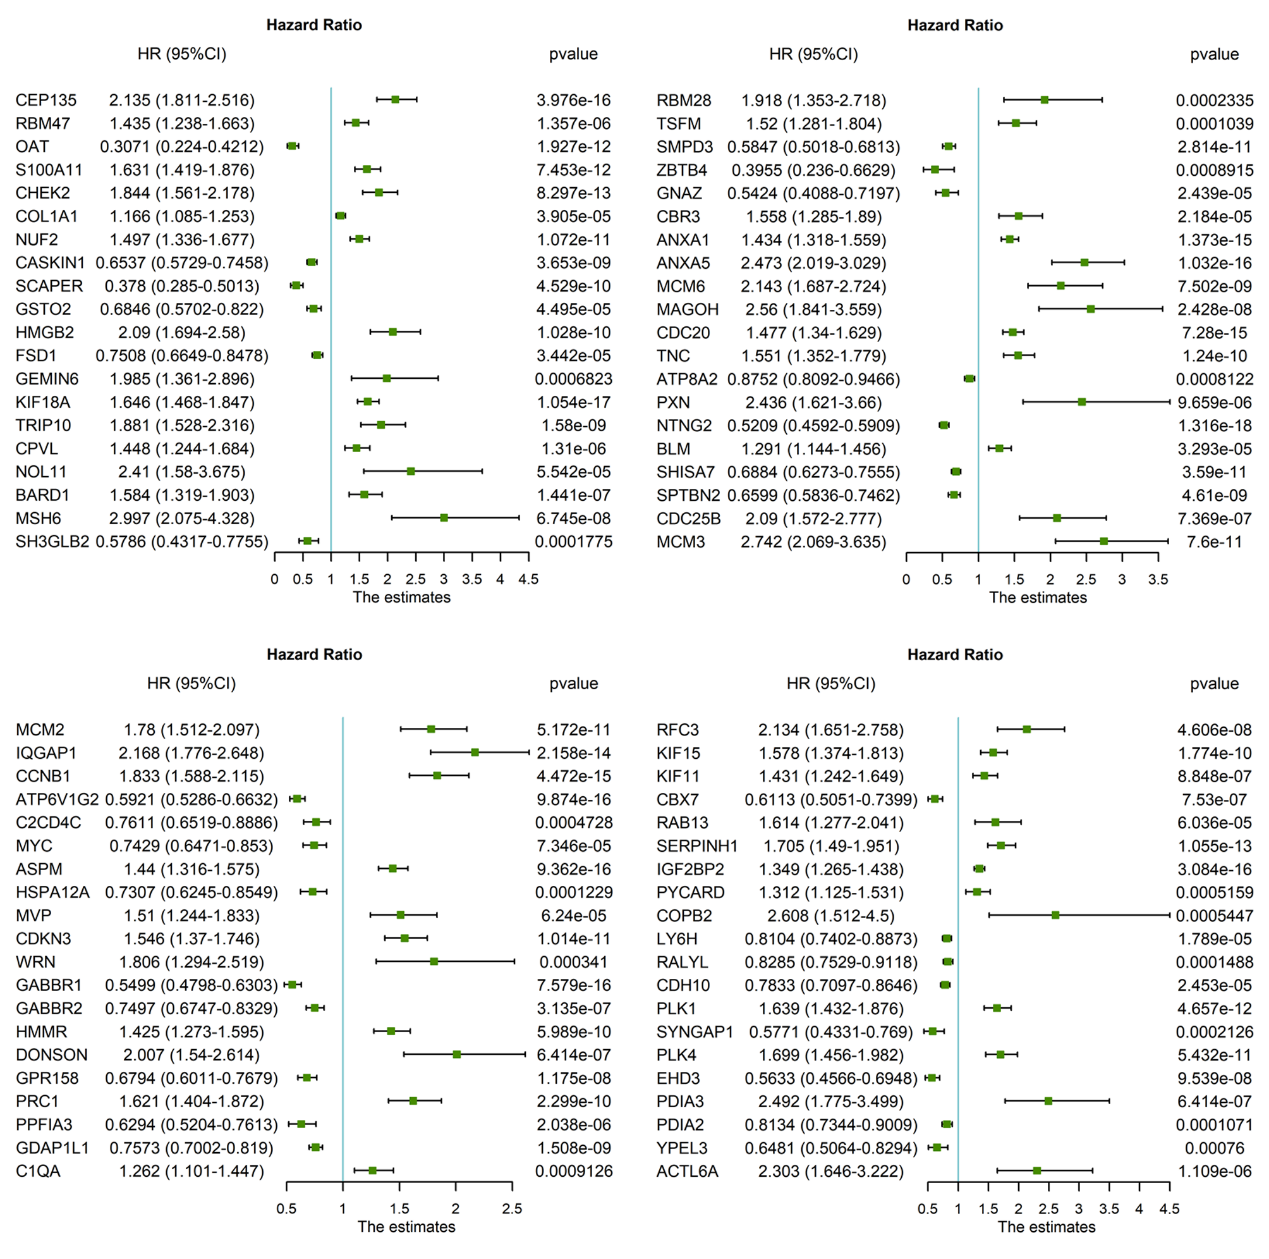

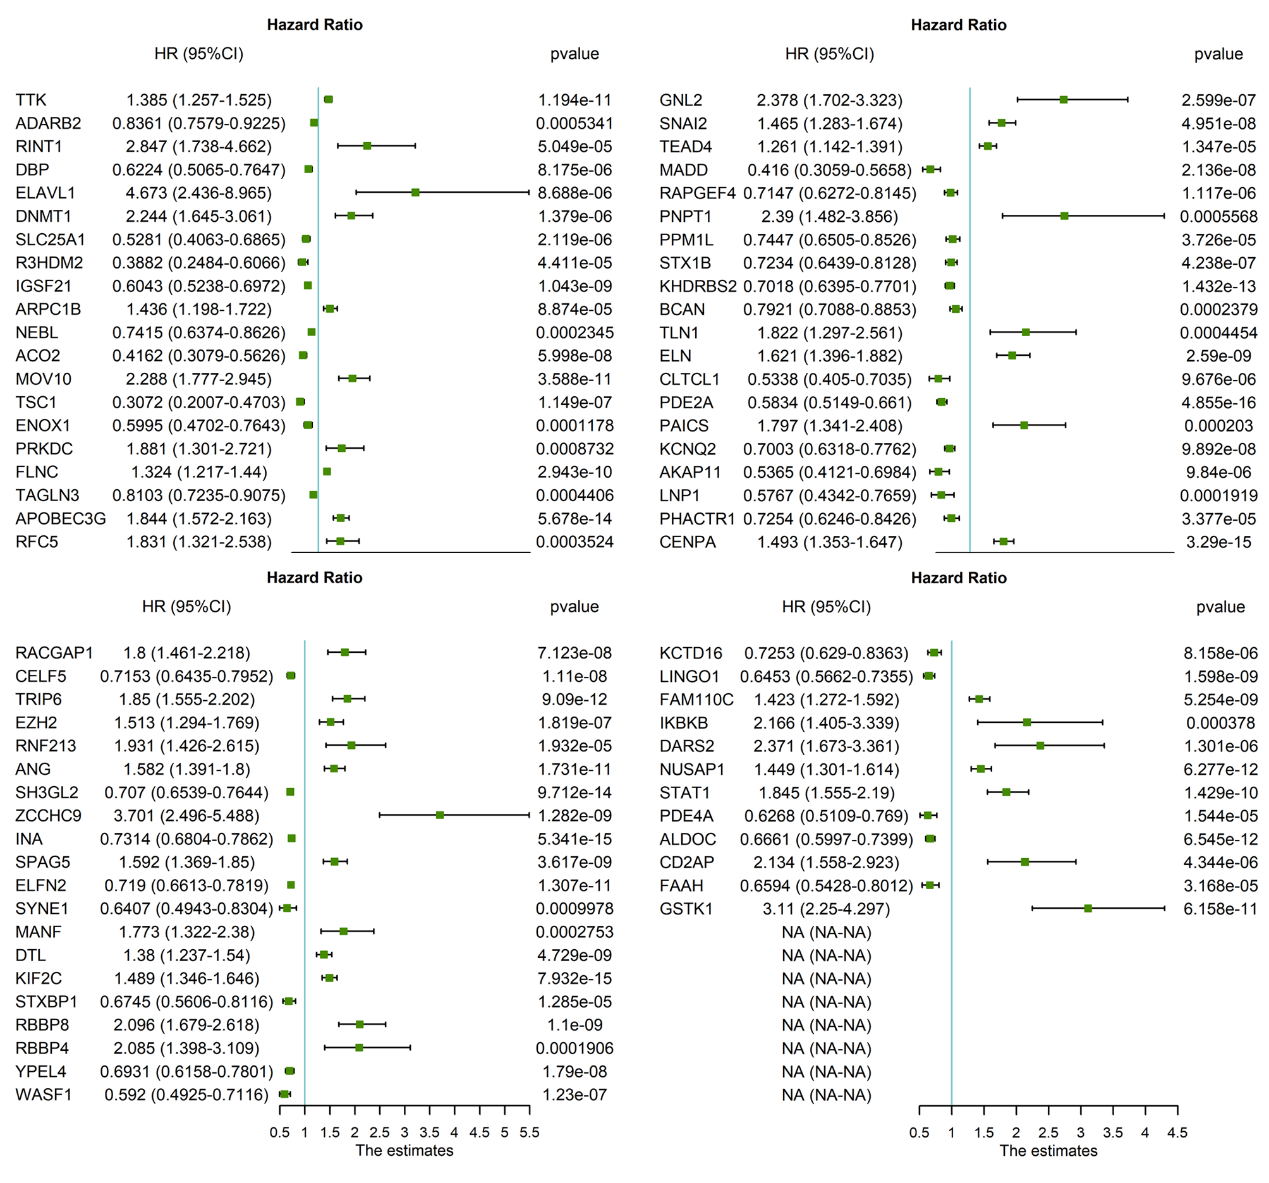


**Figure S4** The forest plots for 312 survival-associated genes.
